# Supplementary material
Source: PubMed Central journal article supplement (PMC6082736)
Supplement: NIHMS974056-supplement-3.pdf [file NIHMS974056-supplement-3.pdf]

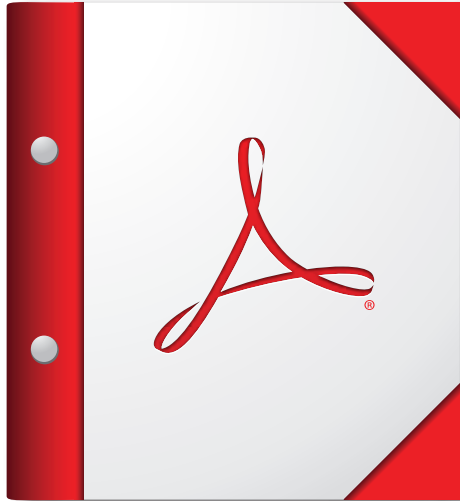

**For the best experience, open this PDF portfolio in  
Acrobat X or Adobe Reader X, or later.**

[Get Adobe Reader Now!](#)
